# Supplementary material for: PD-L1 gene amplification and focality: relationship with protein expression
Source: PubMed Central journal article supplement — J Immunother Cancer. 2023 Feb 27;11(2):e006311. doi: 10.1136/jitc-2022-006311 (PMC9972417; doi:10.1136/jitc-2022-006311), 2023-02-27
Supplement: jitc-2022-006311supp001.pdf [file jitc-2022-006311supp001.pdf]

## **Supplemental Material**

### ***PD-L1* gene amplification and focality: relationship with protein expression**

Supplemental Table 1 – Cohort characteristics

| Characteristic                                      | Study Cohort (N=60,793)      |                   |
|-----------------------------------------------------|------------------------------|-------------------|
| <b>Median Age</b>                                   | <b>66.0 years</b>            |                   |
| <b>Gender (%)</b>                                   | <b>Male</b>                  | <b>28177 (46)</b> |
|                                                     | <b>Female</b>                | <b>32587 (54)</b> |
|                                                     | <b>Unknown</b>               | <b>29</b>         |
| <b>Genomic ancestry (%)</b>                         | <b>African American</b>      | <b>6241 (10)</b>  |
|                                                     | <b>American</b>              | <b>4483 (7)</b>   |
|                                                     | <b>East Asian</b>            | <b>2095 (3)</b>   |
|                                                     | <b>European</b>              | <b>47411 (78)</b> |
|                                                     | <b>South-East Asian</b>      | <b>532 (1)</b>    |
|                                                     | <b>Unknown</b>               | <b>31</b>         |
| <b>Site of tissue specimen for CGP (%)</b>          | <b>Local</b>                 | <b>26483 (44)</b> |
|                                                     | <b>Metastatic</b>            | <b>23788 (39)</b> |
|                                                     | <b>Unknown</b>               | <b>10522 (17)</b> |
| <b>Median tissue specimen tumor purity [95% CI]</b> | <b>49.7% [36.0% - 66.2%]</b> |                   |
| <b>Most frequent histologies</b>                    | <b>N (%)</b>                 |                   |
| Lung Adenocarcinoma                                 | 11961 (20)                   |                   |
| Colon adenocarcinoma                                | 7344 (12)                    |                   |
| Lung squamous cell carcinoma                        | 4932 (8)                     |                   |
| Ovary serous carcinoma                              | 3004 (5)                     |                   |
| Lung non-small cell lung carcinoma (nos)            | 2957 (5)                     |                   |
| Prostate acinar adenocarcinoma                      | 2929 (5)                     |                   |
| Pancreas ductal adenocarcinoma                      | 2560 (4)                     |                   |
| Unknown primary adenocarcinoma                      | 1808 (3)                     |                   |
| Rectum adenocarcinoma                               | 1626 (3)                     |                   |
| Skin melanoma                                       | 1308 (2)                     |                   |

**Abbreviations:** CGP: comprehensive genomic profiling; nos: not other specified

**Supplemental Table 2- Distribution of PDL1 IHC score category over CD274****focality thresholds at a CD274 gain threshold of 4**

| <b>Ploidy Category</b> | <b>Focality Category</b> | <b>PDL1 Status</b> | <b>N</b> |
|------------------------|--------------------------|--------------------|----------|
| <ploidy+4              | <0.1Mb                   | TPS ≥ 50%          | 14       |
| <ploidy+4              | <0.1Mb                   | TPS 1% -49%        | 11       |
| <ploidy+4              | <0.1Mb                   | TPS < 1%           | 17       |
| <ploidy+4              | ≥0.1Mb                   | TPS ≥ 50%          | 7716     |
| <ploidy+4              | ≥0.1Mb                   | TPS 1% -49%        | 16210    |
| <ploidy+4              | ≥0.1Mb                   | TPS < 1%           | 36087    |
| ≥ploidy+4              | <0.1Mb                   | TPS ≥ 50%          | 18       |
| ≥ploidy+4              | <0.1Mb                   | TPS 1% -49%        | 0        |
| ≥ploidy+4              | <0.1Mb                   | TPS < 1%           | 0        |
| ≥ploidy+4              | ≥0.1Mb                   | TPS ≥ 50%          | 368      |
| ≥ploidy+4              | ≥0.1Mb                   | TPS 1% -49%        | 190      |
| ≥ploidy+4              | ≥0.1Mb                   | TPS < 1%           | 162      |
| <ploidy+4              | <4Mb                     | TPS ≥ 50%          | 317      |
| <ploidy+4              | <4Mb                     | TPS 1% -49%        | 357      |
| <ploidy+4              | <4Mb                     | TPS < 1%           | 620      |
| <ploidy+4              | ≥4Mb                     | TPS ≥ 50%          | 7413     |
| <ploidy+4              | ≥4Mb                     | TPS 1% -49%        | 15864    |
| <ploidy+4              | ≥4Mb                     | TPS < 1%           | 35484    |
| ≥ploidy+4              | <4Mb                     | TPS ≥ 50%          | 186      |
| ≥ploidy+4              | <4Mb                     | TPS 1% -49%        | 45       |
| ≥ploidy+4              | <4Mb                     | TPS < 1%           | 17       |
| ≥ploidy+4              | ≥4Mb                     | TPS ≥ 50%          | 200      |
| ≥ploidy+4              | ≥4Mb                     | TPS 1% -49%        | 145      |
| ≥ploidy+4              | ≥4Mb                     | TPS < 1%           | 145      |
| <ploidy+4              | <20Mb                    | TPS ≥ 50%          | 2416     |
| <ploidy+4              | <20Mb                    | TPS 1% -49%        | 3776     |
| <ploidy+4              | <20Mb                    | TPS < 1%           | 7064     |
| <ploidy+4              | ≥20Mb                    | TPS ≥ 50%          | 5314     |
| <ploidy+4              | ≥20Mb                    | TPS 1% -49%        | 12445    |
| <ploidy+4              | ≥20Mb                    | TPS < 1%           | 29040    |
| ≥ploidy+4              | <20Mb                    | TPS ≥ 50%          | 334      |
| ≥ploidy+4              | <20Mb                    | TPS 1% -49%        | 134      |
| ≥ploidy+4              | <20Mb                    | TPS < 1%           | 90       |
| ≥ploidy+4              | ≥20Mb                    | TPS ≥ 50%          | 52       |
| ≥ploidy+4              | ≥20Mb                    | TPS 1% -49%        | 56       |
| ≥ploidy+4              | ≥20Mb                    | TPS < 1%           | 72       |

Abbreviations: TPS, Tumor Proportion Score

**Supplemental Table 3 –Distribution of PDL1 IHC score category over CD274****focality thresholds at a CD274 gain threshold of 2**

| <b>Ploidy Category</b> | <b>Focality Category</b> | <b>PDL1 Status</b> | <b>N</b> |
|------------------------|--------------------------|--------------------|----------|
| <ploidy+2              | <0.1Mb                   | TPS ≥ 50%          | 8        |
| <ploidy+2              | <0.1Mb                   | TPS 1% -49%        | 6        |
| <ploidy+2              | <0.1Mb                   | TPS < 1%           | 16       |
| <ploidy+2              | ≥0.1Mb                   | TPS ≥ 50%          | 6951     |
| <ploidy+2              | ≥0.1Mb                   | TPS 1% -49%        | 15240    |
| <ploidy+2              | ≥0.1Mb                   | TPS < 1%           | 34405    |
| ≥ploidy+2              | <0.1Mb                   | TPS ≥ 50%          | 24       |
| ≥ploidy+2              | <0.1Mb                   | TPS 1% -49%        | 5        |
| ≥ploidy+2              | <0.1Mb                   | TPS < 1%           | 1        |
| ≥ploidy+2              | ≥0.1Mb                   | TPS ≥ 50%          | 1133     |
| ≥ploidy+2              | ≥0.1Mb                   | TPS 1% -49%        | 1160     |
| ≥ploidy+2              | ≥0.1Mb                   | TPS < 1%           | 1844     |
| <ploidy+2              | <4Mb                     | TPS ≥ 50%          | 220      |
| <ploidy+2              | <4Mb                     | TPS 1% -49%        | 290      |
| <ploidy+2              | <4Mb                     | TPS < 1%           | 569      |
| <ploidy+2              | ≥4Mb                     | TPS ≥ 50%          | 6739     |
| <ploidy+2              | ≥4Mb                     | TPS 1% -49%        | 14956    |
| <ploidy+2              | ≥4Mb                     | TPS < 1%           | 33852    |
| ≥ploidy+2              | <4Mb                     | TPS ≥ 50%          | 283      |
| ≥ploidy+2              | <4Mb                     | TPS 1% -49%        | 112      |
| ≥ploidy+2              | <4Mb                     | TPS < 1%           | 68       |
| ≥ploidy+2              | ≥4Mb                     | TPS ≥ 50%          | 874      |
| ≥ploidy+2              | ≥4Mb                     | TPS 1% -49%        | 1053     |
| ≥ploidy+2              | ≥4Mb                     | TPS < 1%           | 1777     |
| <ploidy+2              | <20Mb                    | TPS ≥ 50%          | 2005     |
| <ploidy+2              | <20Mb                    | TPS 1% -49%        | 3390     |
| <ploidy+2              | <20Mb                    | TPS < 1%           | 6610     |
| <ploidy+2              | ≥20Mb                    | TPS ≥ 50%          | 4954     |
| <ploidy+2              | ≥20Mb                    | TPS 1% -49%        | 11856    |
| <ploidy+2              | ≥20Mb                    | TPS < 1%           | 27811    |
| ≥ploidy+2              | <20Mb                    | TPS ≥ 50%          | 745      |
| ≥ploidy+2              | <20Mb                    | TPS 1% -49%        | 520      |
| ≥ploidy+2              | <20Mb                    | TPS < 1%           | 544      |
| ≥ploidy+2              | ≥20Mb                    | TPS ≥ 50%          | 412      |
| ≥ploidy+2              | ≥20Mb                    | TPS 1% -49%        | 645      |
| ≥ploidy+2              | ≥20Mb                    | TPS < 1%           | 1301     |

Abbreviations: TPS, Tumor Proportion Score

**Supplemental Table 4 - Distribution of samples across focality (20 Mb cutoff) and PDL1 score (50 TPS cutoff) bins at a ploidy cutoff of 4, for Non Small Cell Lung Cancer (NSCLC), Colorectal cancer (CRC), and the rest of the cohort**

| <b>NSCLC, <math>\geq</math> ploidy + 4<br/>(n=321)</b>                         | <b>PDL1 TPS: &lt;50</b> | <b>PDL1 TPS: <math>\geq</math>50</b> |
|--------------------------------------------------------------------------------|-------------------------|--------------------------------------|
| <b>Focality category: &lt;20 Mb</b>                                            | 74                      | 199                                  |
| <b>Focality category: <math>\geq</math>20 Mb</b>                               | 21                      | 27                                   |
| Two-sided Fisher's exact test odds ratio = 0.48[0.24-0.95], P Value = 0.02     |                         |                                      |
| <b>NSCLC, &lt; ploidy + 4<br/>(n=20241)</b>                                    | <b>PDL1 TPS: &lt;50</b> | <b>PDL1 TPS: <math>\geq</math>50</b> |
| <b>Focality category: &lt;20 Mb</b>                                            | 3815                    | 1843                                 |
| <b>Focality category: <math>\geq</math>20 Mb</b>                               | 10802                   | 3781                                 |
| Two-sided Fisher's exact test odds ratio = 0.72[0.68-0.78], P Value = 6.56e-21 |                         |                                      |
| <b>CRC, <math>\geq</math> ploidy + 4 (n=72)</b>                                | <b>PDL1 TPS: &lt;50</b> | <b>PDL1 TPS: <math>\geq</math>50</b> |
| <b>Focality category: &lt;20 Mb</b>                                            | 17                      | 5                                    |
| <b>Focality category: <math>\geq</math>20 Mb</b>                               | 49                      | 1                                    |
| Two-sided Fisher's exact test odds ratio = 0.07[0.001-0.71], P Value = 0.009   |                         |                                      |
| <b>CRC, &lt; ploidy + 4 (n=8922)</b>                                           | <b>PDL1 TPS: &lt;50</b> | <b>PDL1 TPS: <math>\geq</math>50</b> |
| <b>Focality category: &lt;20 Mb</b>                                            | 912                     | 17                                   |
| <b>Focality category: <math>\geq</math>20 Mb</b>                               | 7901                    | 92                                   |
| Two-sided Fisher's exact test odds ratio = 0.62[0.37-1.12], P Value = 0.08     |                         |                                      |
| <b>Others, <math>\geq</math> ploidy + 4<br/>(n=345)</b>                        | <b>PDL1 TPS: &lt;50</b> | <b>PDL1 TPS: <math>\geq</math>50</b> |
| <b>Focality category: &lt;20 Mb</b>                                            | 133                     | 130                                  |
| <b>Focality category: <math>\geq</math>20 Mb</b>                               | 58                      | 24                                   |
| Two-sided Fisher's exact test odds ratio = 0.42[0.24-0.74], P Value = 0.001    |                         |                                      |
| <b>Others, &lt; ploidy + 4<br/>(n=30892)</b>                                   | <b>PDL1 TPS: &lt;50</b> | <b>PDL1 TPS: <math>\geq</math>50</b> |
| <b>Focality category: &lt;20 Mb</b>                                            | 6113                    | 556                                  |
| <b>Focality category: <math>\geq</math>20 Mb</b>                               | 22782                   | 1441                                 |
| Two-sided Fisher's exact test odds ratio = 0.70[0.63-0.77], P Value = 9.03e-12 |                         |                                      |
